# Supplementary material for: Silver-Protein Nanocomposites as Antimicrobial Agents
Source: MDPI journal article supplement (doi:10.3390/nano11113006), 2021-11-09
Supplement: s1 [file s1]

# Supplementary Materials:

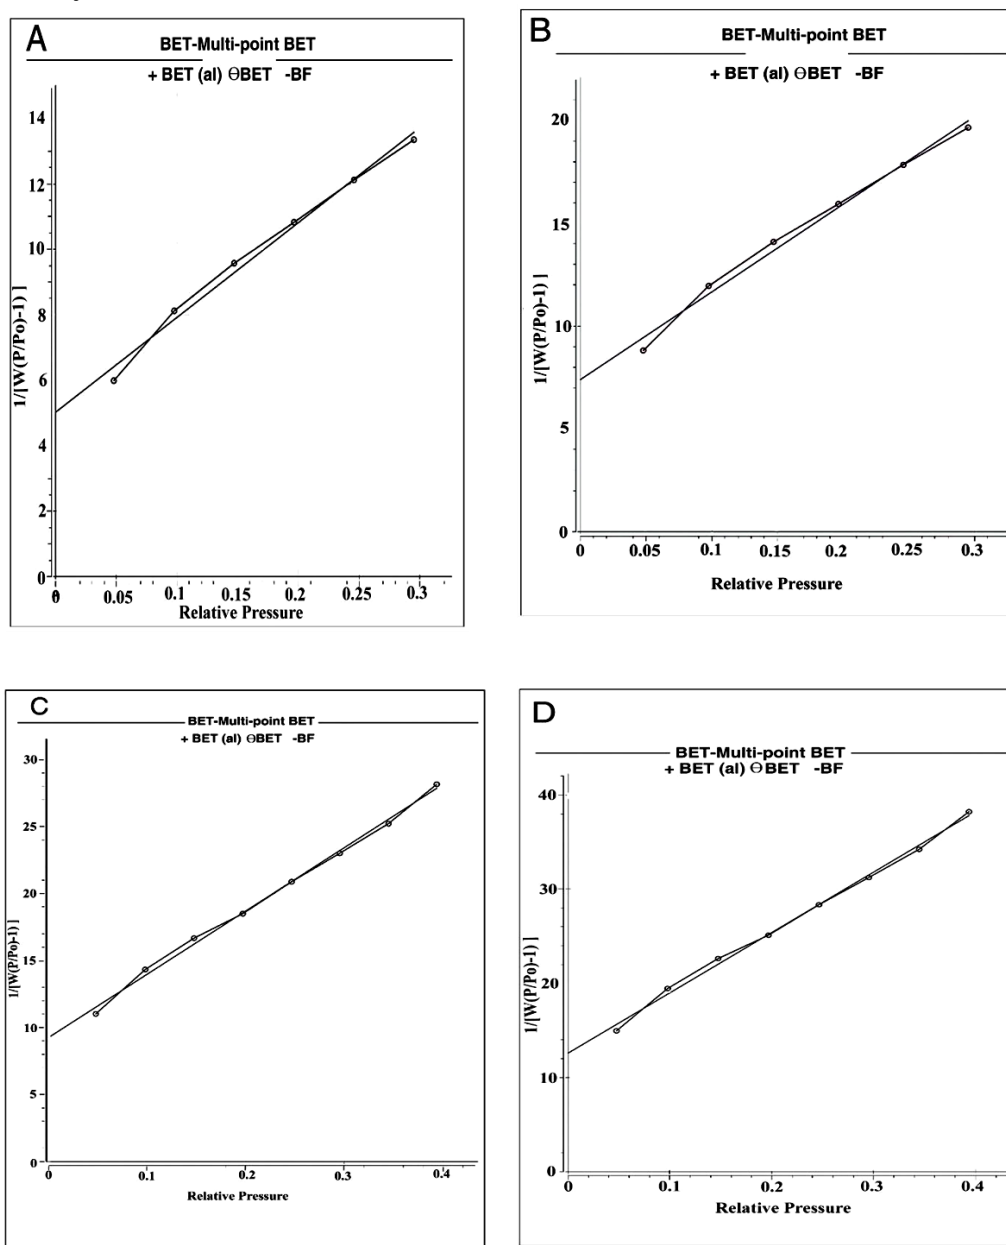

**Supplementary Figure S1.** The specific surface area measured with Brunauer–Emmett–Teller isotherm (BET) of (A): FNP; (B): Ag- FNP; (C): MNP; (D): Ag- MNP.

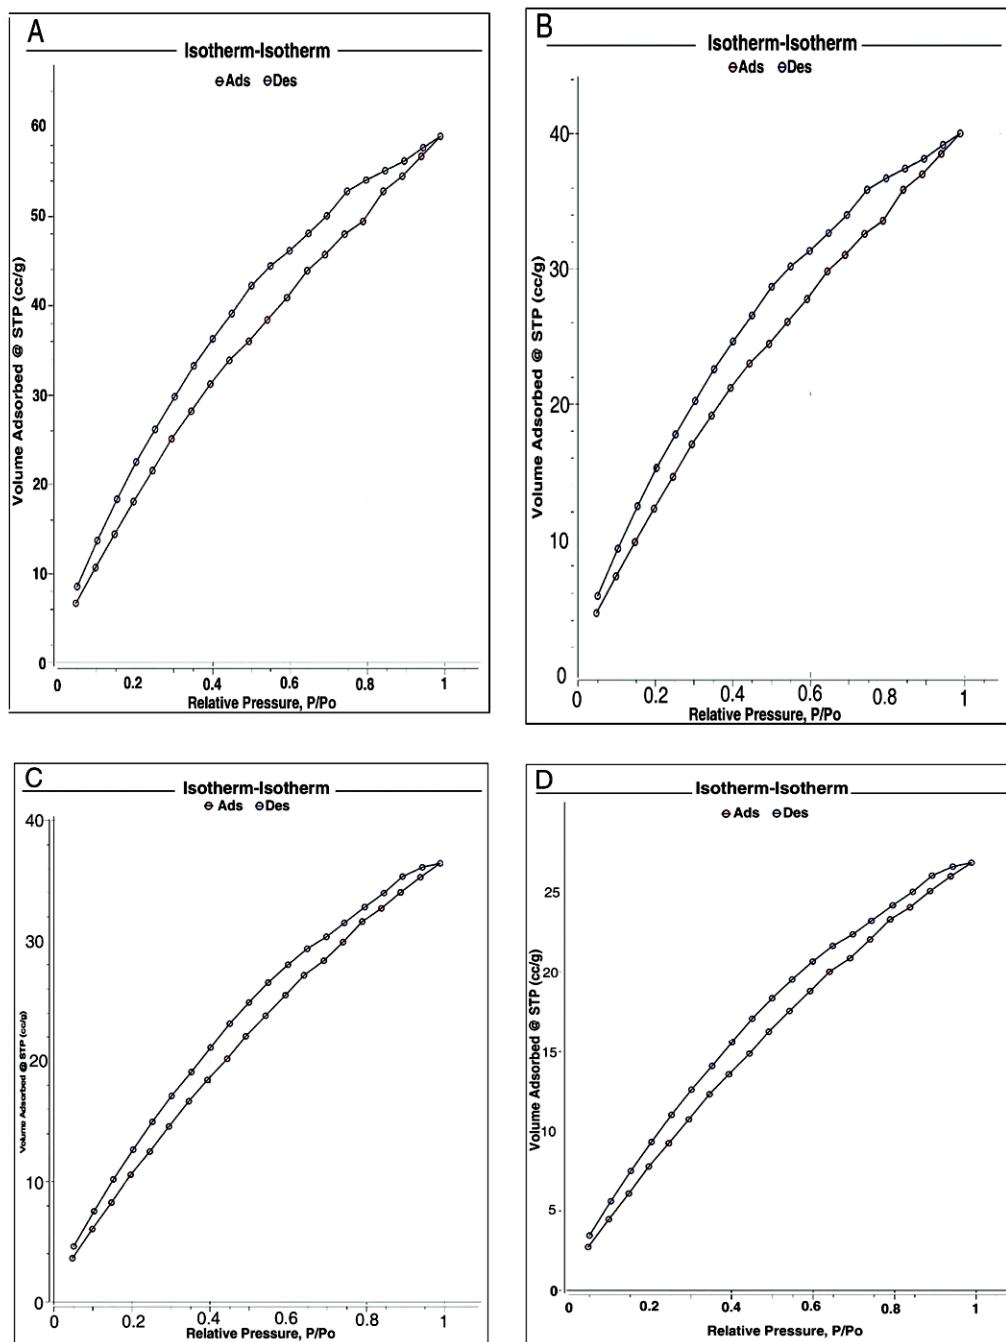

**Supplementary Figure S2.** The isotherm curve of (A): FNP; (B): Ag-FNP; (C): MNP; (D): Ag-MNP.

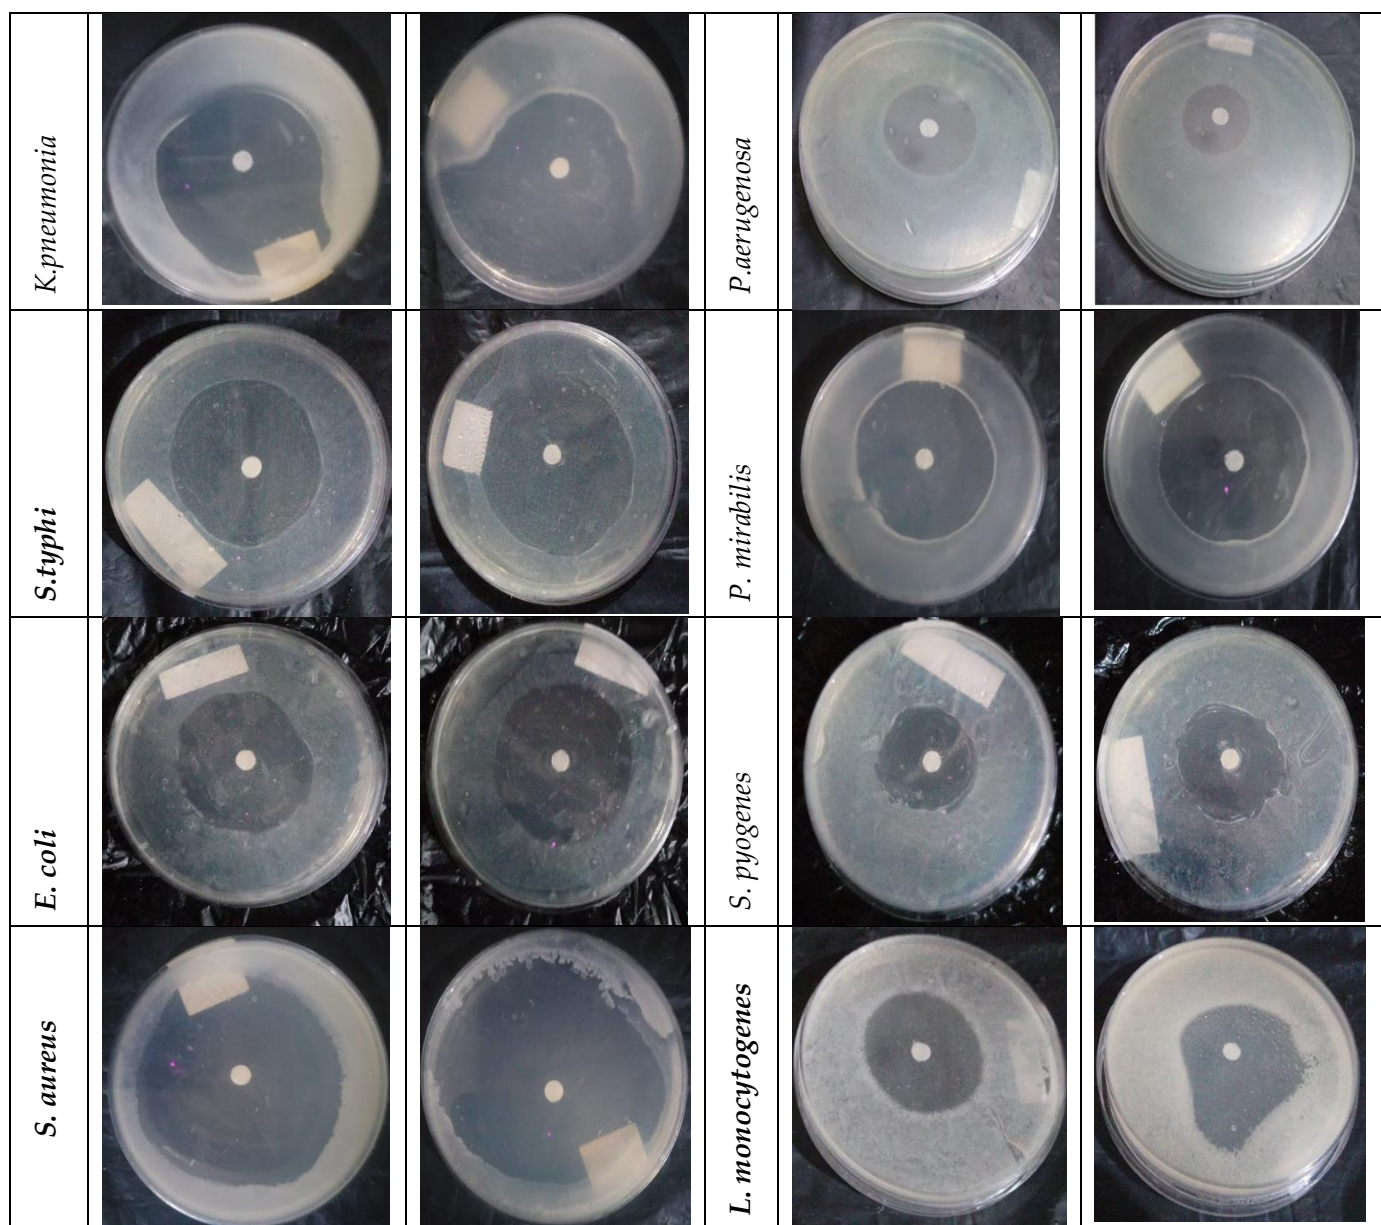

**Supplementary Figure S3.** Antibacterial activity of silver mung bean protein nanocomposite (Ag-MNP), and silver fenugreek protein nanocomposite (Ag-FNP) against Gram positive and Gram negative bacteria.
